# Supplementary material for: Prevalence of Bladder and Bowel Dysfunction in Duchenne Muscular Dystrophy Using the Childhood Bladder and Bowel Dysfunction Questionnaire
Source: MDPI journal article supplement (doi:10.3390/life11080772), 2021-07-30
Supplement: s1 [file s1]

## Childhood Bladder and Bowel Dysfunction Questionnaire (CBBDQ)

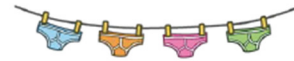

De vragenlijst voor plas- en ontlastingsproblemen bij kinderen van 5-12 jaar

Kies bij elke vraag het antwoord dat het beste van toepassing is op uw kind in de afgelopen maand.

Als u het antwoord niet weet, vraag het dan aan uw kind (of vul de vragenlijst samen met uw kind in).

NB. niet alle vragen hebben dezelfde antwoordmogelijkheden.

Mijn kind...

|    |                                                                                                  |                          |       |                          |                                      |                          |                                      |                          |                                        |                          |                      |
|----|--------------------------------------------------------------------------------------------------|--------------------------|-------|--------------------------|--------------------------------------|--------------------------|--------------------------------------|--------------------------|----------------------------------------|--------------------------|----------------------|
| 1  | plast overdag vaker dan 8 keer.                                                                  | <input type="checkbox"/> | nooit | <input type="checkbox"/> | 1 maal per <u>maand</u><br>of minder | <input type="checkbox"/> | meerdere malen<br>per <u>maand</u>   | <input type="checkbox"/> | 1 of meerdere<br>malen per <u>week</u> | <input type="checkbox"/> | (bijna)<br>dagelijks |
| 2  | heeft overdag een natte<br>(onder)broek ( <i>een klein plekje<br/>wordt als nat beschouwd</i> ). | <input type="checkbox"/> | nooit | <input type="checkbox"/> | 1 maal per <u>maand</u><br>of minder | <input type="checkbox"/> | meerdere malen<br>per <u>maand</u>   | <input type="checkbox"/> | 1 of meerdere<br>malen per <u>week</u> | <input type="checkbox"/> | (bijna)<br>dagelijks |
| 3  | verliest <u>direct na</u> het plassen<br>enkele druppels urine.                                  | <input type="checkbox"/> | nooit | <input type="checkbox"/> | 1 maal per <u>maand</u><br>of minder | <input type="checkbox"/> | meerdere malen<br>per <u>maand</u>   | <input type="checkbox"/> | 1 of meerdere<br>malen per <u>week</u> | <input type="checkbox"/> | (bijna)<br>dagelijks |
| 4  | verliest binnen één uur na het<br>plassen urine.                                                 | <input type="checkbox"/> | nooit | <input type="checkbox"/> | 1 maal per <u>maand</u><br>of minder | <input type="checkbox"/> | meerdere malen<br>per <u>maand</u>   | <input type="checkbox"/> | 1 of meerdere<br>malen per <u>week</u> | <input type="checkbox"/> | (bijna)<br>dagelijks |
| 5  | lijkt de aandrang tot plassen te<br>negeren.                                                     | <input type="checkbox"/> | nooit | <input type="checkbox"/> | 1 maal per <u>maand</u><br>of minder | <input type="checkbox"/> | meerdere malen<br>per <u>maand</u>   | <input type="checkbox"/> | 1 of meerdere<br>malen per <u>week</u> | <input type="checkbox"/> | (bijna)<br>dagelijks |
| 6  | gebruikt trucjes om droog te<br>blijven, zoals wiebelen of benen<br>stijf gekruist houden.       | <input type="checkbox"/> | nooit | <input type="checkbox"/> | 1 maal per <u>maand</u><br>of minder | <input type="checkbox"/> | meerdere malen<br>per <u>maand</u>   | <input type="checkbox"/> | 1 of meerdere<br>malen per <u>week</u> | <input type="checkbox"/> | (bijna)<br>dagelijks |
| 7  | wordt overvallen door een<br>onbedwingbare aandrang om te<br>plassen.                            | <input type="checkbox"/> | nooit | <input type="checkbox"/> | 1 maal per <u>maand</u><br>of minder | <input type="checkbox"/> | meerdere malen<br>per <u>maand</u>   | <input type="checkbox"/> | 1 of meerdere<br>malen per <u>week</u> | <input type="checkbox"/> | (bijna)<br>dagelijks |
| 8  | stelt de eerste plas van de<br>ochtend uit.                                                      | <input type="checkbox"/> | nooit | <input type="checkbox"/> | 1 maal per <u>maand</u><br>of minder | <input type="checkbox"/> | meerdere malen<br>per <u>maand</u>   | <input type="checkbox"/> | 1 of meerdere<br>malen per <u>week</u> | <input type="checkbox"/> | (bijna)<br>dagelijks |
| 9  | plast tijdens de slaap in bed of<br>luier.                                                       | <input type="checkbox"/> | nooit | <input type="checkbox"/> | minder dan 1<br>maal per <u>week</u> | <input type="checkbox"/> | 1 tot 2 maal per<br><u>week</u>      | <input type="checkbox"/> | 3 tot 5 maal per<br><u>week</u>        | <input type="checkbox"/> | (bijna)<br>dagelijks |
| 10 | wordt 's nachts wakker om te<br>plassen.                                                         | <input type="checkbox"/> | nooit | <input type="checkbox"/> | minder dan 1<br>maal per <u>week</u> | <input type="checkbox"/> | 1 tot 2 maal per<br><u>week</u>      | <input type="checkbox"/> | 3 tot 5 maal per<br><u>week</u>        | <input type="checkbox"/> | (bijna)<br>dagelijks |
| 11 | heeft twee keer of minder per<br>week ontlasting.                                                | <input type="checkbox"/> | nooit | <input type="checkbox"/> | 1 maal per <u>maand</u><br>of minder | <input type="checkbox"/> | hooguit 1-2 keer<br>per <u>maand</u> | <input type="checkbox"/> | meerdere malen<br>per <u>maand</u>     | <input type="checkbox"/> | heel vaak            |
| 12 | heeft ontlasting of vegen in de<br>onderbroek.                                                   | <input type="checkbox"/> | nooit | <input type="checkbox"/> | 1 maal per <u>maand</u><br>of minder | <input type="checkbox"/> | meerdere malen<br>per <u>maand</u>   | <input type="checkbox"/> | 1 of meerdere<br>malen per <u>week</u> | <input type="checkbox"/> | (bijna)<br>dagelijks |
| 13 | heeft harde poep of pijn bij de<br>ontlasting.                                                   | <input type="checkbox"/> | nooit | <input type="checkbox"/> | 1 maal per <u>maand</u><br>of minder | <input type="checkbox"/> | meerdere malen<br>per <u>maand</u>   | <input type="checkbox"/> | 1 of meerdere<br>malen per <u>week</u> | <input type="checkbox"/> | (bijna)<br>dagelijks |
| 14 | heeft een grote hoeveelheid<br>ontlasting ( <i>waarvan het toilet<br/>verstopt kan raken</i> ).  | <input type="checkbox"/> | nooit | <input type="checkbox"/> | 1 maal per <u>maand</u><br>of minder | <input type="checkbox"/> | meerdere malen<br>per <u>maand</u>   | <input type="checkbox"/> | 1 of meerdere<br>malen per <u>week</u> | <input type="checkbox"/> | (bijna)<br>dagelijks |
| 15 | stelt het ontlasten uit.                                                                         | <input type="checkbox"/> | nooit | <input type="checkbox"/> | 1 maal per <u>maand</u><br>of minder | <input type="checkbox"/> | meerdere malen<br>per <u>maand</u>   | <input type="checkbox"/> | 1 of meerdere<br>malen per <u>week</u> | <input type="checkbox"/> | (bijna)<br>dagelijks |
| 16 | wordt overvallen door een<br>onbedwingbare aandrang om te<br>ontlasten.                          | <input type="checkbox"/> | nooit | <input type="checkbox"/> | 1 maal per <u>maand</u><br>of minder | <input type="checkbox"/> | meerdere malen<br>per <u>maand</u>   | <input type="checkbox"/> | 1 of meerdere<br>malen per <u>week</u> | <input type="checkbox"/> | (bijna)<br>dagelijks |
| 17 | heeft buikpijn.                                                                                  | <input type="checkbox"/> | nooit | <input type="checkbox"/> | 1 maal per <u>maand</u><br>of minder | <input type="checkbox"/> | meerdere malen<br>per <u>maand</u>   | <input type="checkbox"/> | 1 of meerdere<br>malen per <u>week</u> | <input type="checkbox"/> | (bijna)<br>dagelijks |
| 18 | heeft een opgeblazen buik.                                                                       | <input type="checkbox"/> | nooit | <input type="checkbox"/> | 1 maal per <u>maand</u><br>of minder | <input type="checkbox"/> | meerdere malen<br>per <u>maand</u>   | <input type="checkbox"/> | 1 of meerdere<br>malen per <u>week</u> | <input type="checkbox"/> | (bijna)<br>dagelijks |
